# Supplementary material for: Vertical organic transistors with a permeable base: from fundamentals to performance prediction
Source: Royal Society of Chemistry journal article supplement (doi:10.1039/d3tc00299c), 2023-01-01
Supplement: d3tc00299c1.pdf [file d3tc00299c1.pdf]

## Electronic Supplementary Information

# Vertical organic transistors with permeable base: from fundamentals to performance prediction

*Hyuna Lee,<sup>a</sup> Kyung-Geun Lim,<sup>b,\*</sup> and Chang-Hyun Kim<sup>a,\*</sup>*

<sup>a</sup> School of Electronic Engineering, Gachon University, Seongnam 13120, Republic of Korea

<sup>b</sup> Korea Research Institute of Standards and Science (KRISS), Daejeon 34113, Republic of Korea.

\*Corresponding authors: kglim@kriss.re.kr (K.-G.L.), chang-hyun.kim@gachon.ac.kr (C.-H.K.).

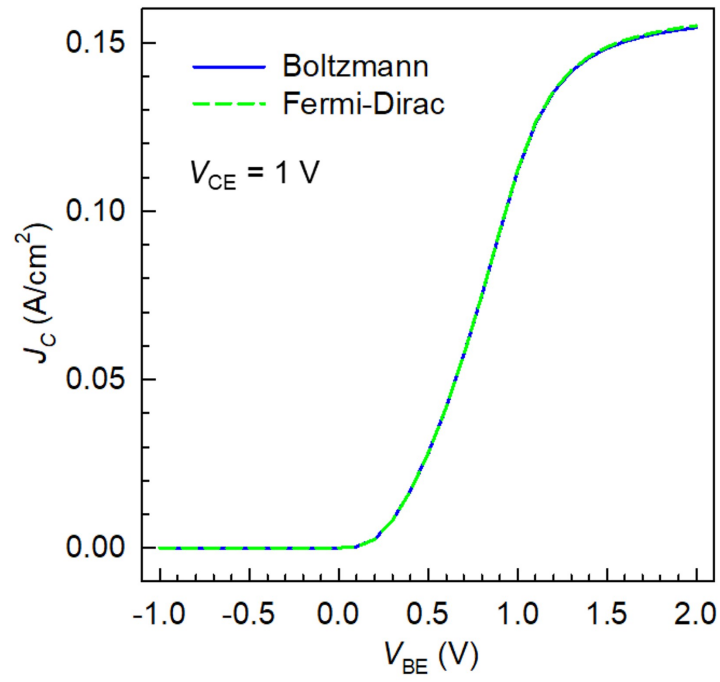

**Figure S1.** Direct comparison between the transfer curves of the OPBT obtained by simulations with the Boltzmann and the Fermi-Dirac carrier statistics. The device structure and all the input parameters are the same as those that produced the optimized fit to the experimental C<sub>60</sub> device.

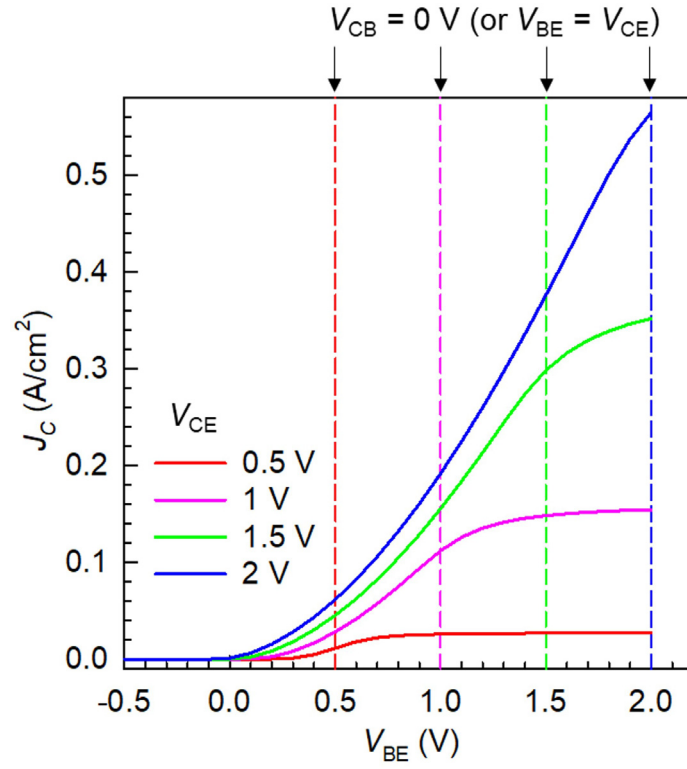

**Figure S2.** Simulation data showing the direct impact of the value of applied  $V_{CE}$  on the transfer characteristics. These results visualize the occurrence of  $J_C$  saturation at a voltage point roughly satisfying  $V_{CB} = 0 \text{ V}$ .

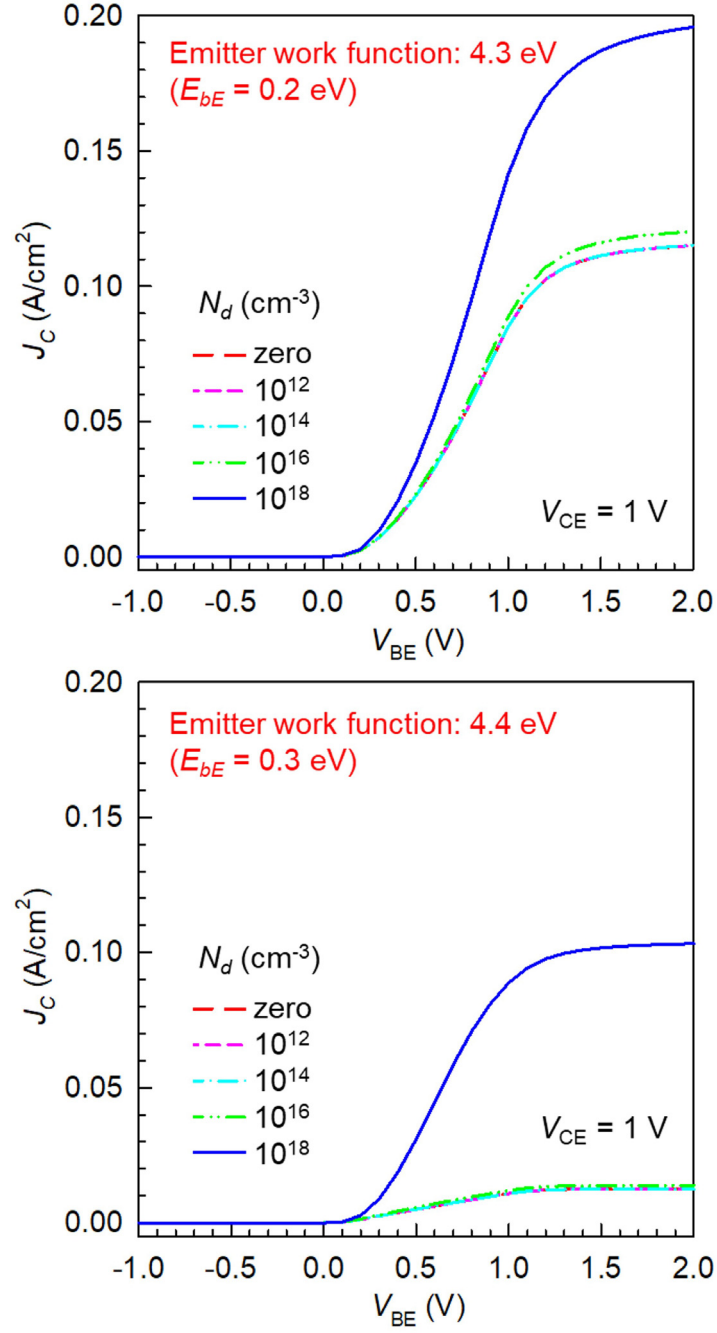

**Figure S3.** Simulation data showing the significant impact of the emitter work function (and the corresponding emitter electron-injection barrier  $E_{bE}$ ) on the transfer characteristics. Each graph contains the doping density variation for the doped C<sub>60</sub> region.
